# Supplementary material for: Catalytic Oxidation of Chlorobenzene over HSiW/CeO2 as a Co-Benefit of NOx Reduction: Remarkable Inhibition of Chlorobenzene Oxidation by NH3
Source: MDPI journal article supplement (doi:10.3390/ma17040828), 2024-02-08
Supplement: s1 [file s1]

# Supporting Information

## Catalytic oxidation of chlorobenzene over HSiW/CeO<sub>2</sub> as a co-benefit of NO<sub>x</sub> reduction: Remarkable inhibition of chlorobenzene oxidation by NH<sub>3</sub>

Leyuan Dong, Keyu Jiang, Qi Shen, Lijuan Xie, Jian Mei\*, Shijian Yang

*School of Environment & Ecology, Jiangnan University, Wuxi, 214122, P. R. China*

Corresponding Author:

\* School of Environment & Ecology, Jiangnan University. Telephone: 86-15121199536; E-mail: [jsjhmj@126.com](mailto:jsjhmj@126.com) (Jian Mei).

Content including: **Five** pages, one table, and **eight** figures.

**Table S1** Percentages of Ce and W species on/in HSiW/CeO<sub>2</sub> and V<sub>2</sub>O<sub>5</sub>-WO<sub>3</sub>/TiO<sub>2</sub> /%

|                                                                                       | Ce | V   | W   | Ce/W |
|---------------------------------------------------------------------------------------|----|-----|-----|------|
| HSiW/CeO <sub>2</sub> from XPS analysis                                               | 21 | -   | 3.7 | 5.7  |
| HSiW/CeO <sub>2</sub> from XRF analysis                                               | 31 | -   | 1.7 | 18   |
| 1% V <sub>2</sub> O <sub>5</sub> -WO <sub>3</sub> /TiO <sub>2</sub> from XRF analysis | -  | 1.4 | 9.2 | -    |
| 3% V <sub>2</sub> O <sub>5</sub> -WO <sub>3</sub> /TiO <sub>2</sub> from XRF analysis | -  | 5.3 | 9.1 | -    |

---

\* Corresponding author.

E-mail: [jsjhmj@126.com](mailto:jsjhmj@126.com) (J. Mei).

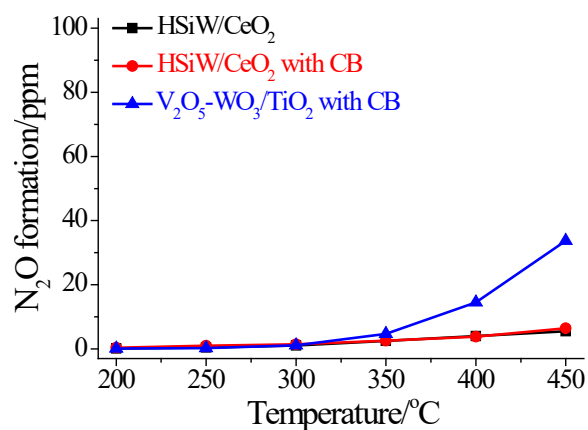

**Fig. S1** N<sub>2</sub>O formation during NO<sub>x</sub> reduction over HSiW/CeO<sub>2</sub>. Reaction condition: [NO<sub>x</sub>] = 500 ppm (during use), [NH<sub>3</sub>] = 500 ppm (during use), [CB] = 100 ppm (during use), [O<sub>2</sub>] = 5%, catalyst mass = 30 mg, total flow rate = 200 mL min<sup>-1</sup>, and GHSV = 400,000 cm<sup>3</sup> g<sup>-1</sup> h<sup>-1</sup>.

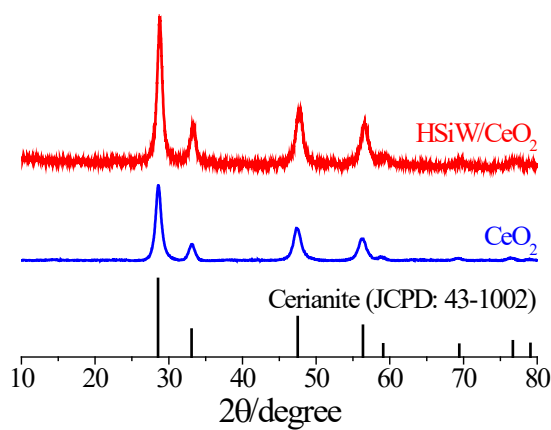

**Fig. S2** XRD patterns of CeO<sub>2</sub> and HSiW/CeO<sub>2</sub>.

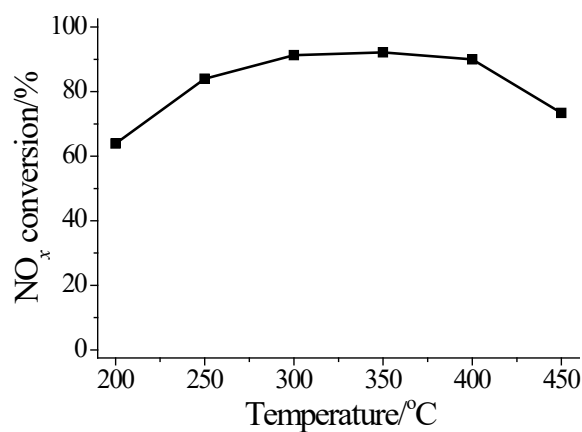

**Fig. S3** NO<sub>x</sub> conversion efficiency of HSiW/CeO<sub>2</sub> with a high GHSV. Reaction condition: [NO<sub>x</sub>] = 500 ppm, [NH<sub>3</sub>] = 500 ppm, [O<sub>2</sub>] = 5%, catalyst mass = 50 mg, total flow rate = 200 mL min<sup>-1</sup>, and GHSV = 240,000 cm<sup>3</sup> g<sup>-1</sup> h<sup>-1</sup>.

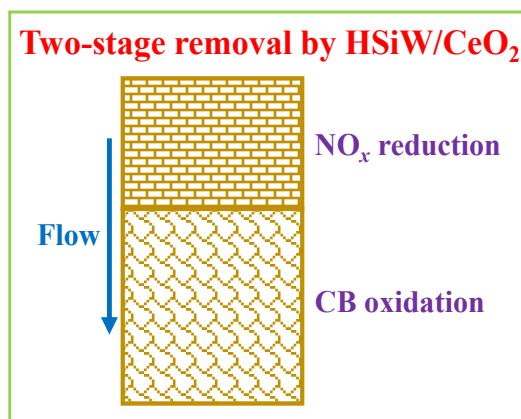

**Fig. S4** Two-stage removals of NO<sub>x</sub> and CB over HSiW/CeO<sub>2</sub>.

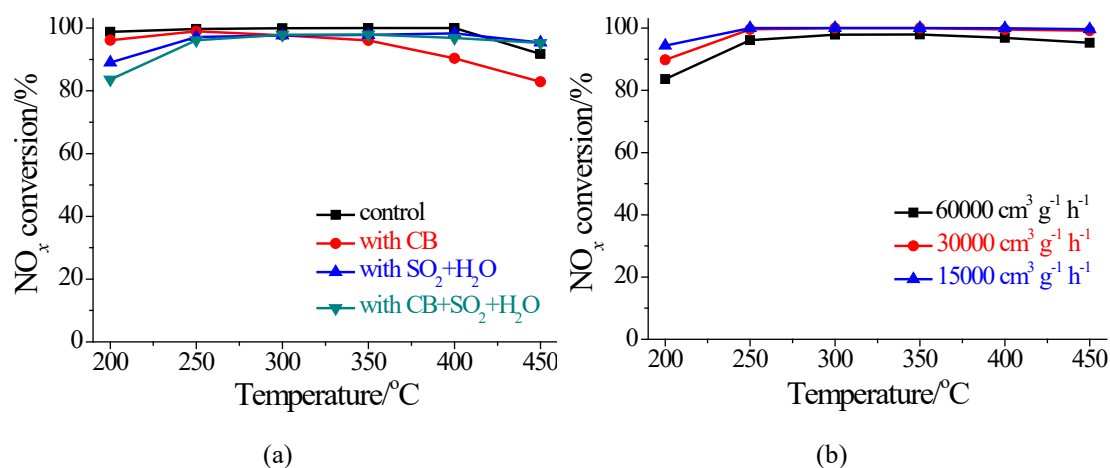

**Fig. S5** (a) NO<sub>x</sub> conversion efficiency of HSiW/CeO<sub>2</sub> with a low GHSV of normal SCR condition. Reaction condition: [NO<sub>x</sub>] = 500 ppm (during use), [NH<sub>3</sub>] = 500 ppm (during use), [CB] = 100 ppm (during use), [O<sub>2</sub>] = 5%, [SO<sub>2</sub>] = 100 ppm (during use), [H<sub>2</sub>O] = 8% (during use), catalyst mass = 200 mg, total flow rate = 200 mL min<sup>-1</sup>, and GHSV = 60,000 cm<sup>3</sup> g<sup>-1</sup> h<sup>-1</sup>. (b) Influence of GHSV on NO<sub>x</sub> conversion efficiency of HSiW/CeO<sub>2</sub>. Reaction condition: [NO<sub>x</sub>] = 500 ppm, [NH<sub>3</sub>] = 500 ppm, [CB] = 100 ppm, [O<sub>2</sub>] = 5%, [SO<sub>2</sub>] = 100 ppm, [H<sub>2</sub>O] = 8%, catalyst mass = 200–800 mg, and total flow rate = 200 mL min<sup>-1</sup>.

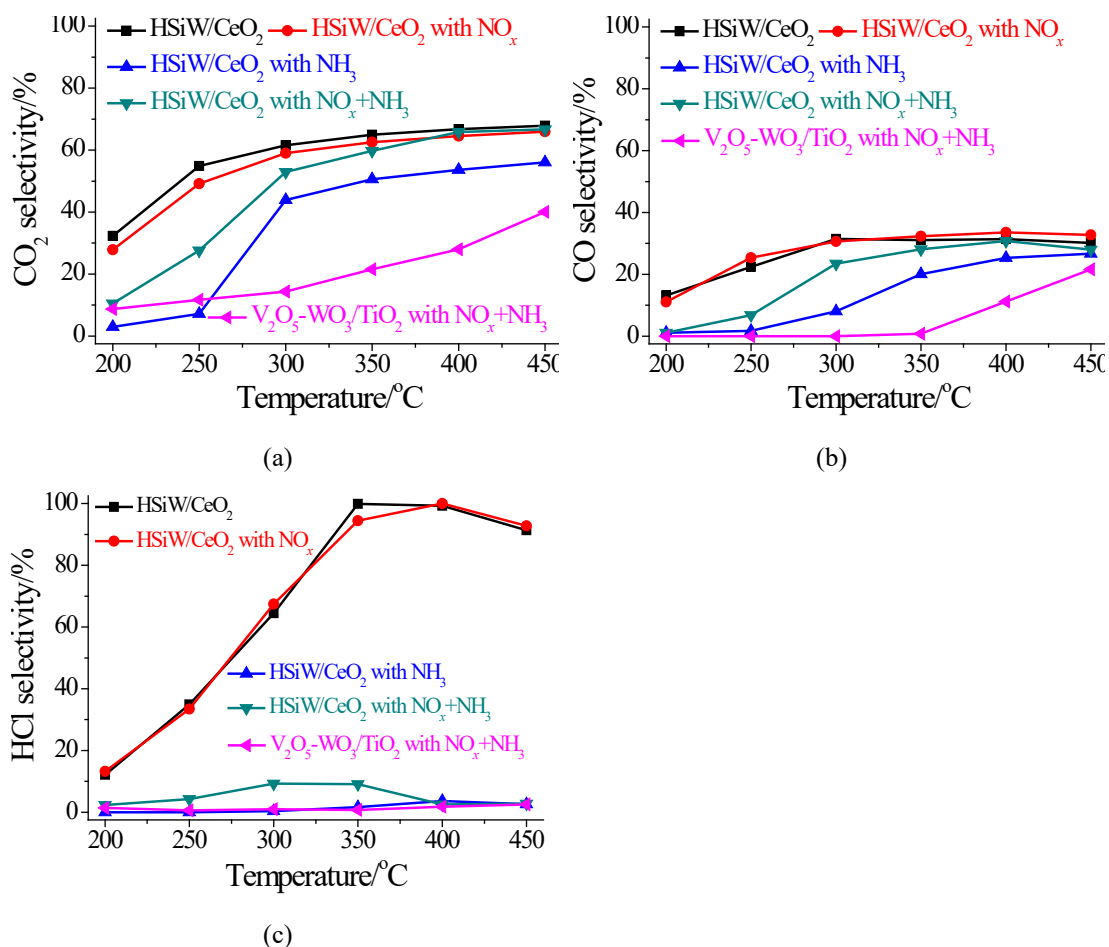

**Fig. S6** Selectivities towards (a)  $\text{CO}_2$ , (b)  $\text{CO}$ , and (c)  $\text{HCl}$  of  $\text{HSiW/CeO}_2$  and  $\text{V}_2\text{O}_5\text{-WO}_3/\text{TiO}_2$ . Reaction conditions:  $[\text{NO}_x] = 500 \text{ ppm}$  (during use),  $[\text{NH}_3] = 500 \text{ ppm}$  (during use),  $[\text{CB}] = 100 \text{ ppm}$  (during use),  $[\text{O}_2] = 5\%$ , catalyst mass = 30 mg, total flow rate =  $200 \text{ mL min}^{-1}$ , and GHSV =  $400,000 \text{ cm}^3 \text{ g}^{-1} \text{ h}^{-1}$ .

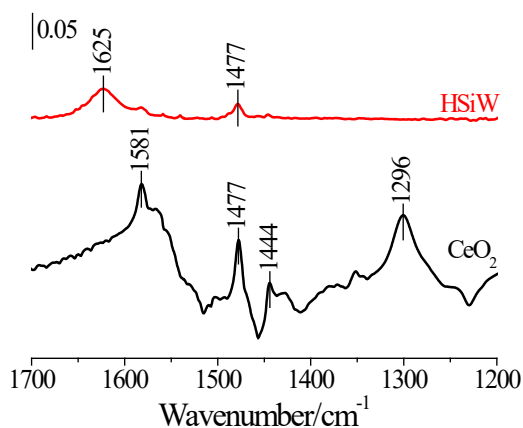

**Fig. S7** *In situ* DRIFTS spectra of passing CB over  $\text{CeO}_2$  and  $\text{HSiW}$  for 30 min at  $100^\circ\text{C}$ .

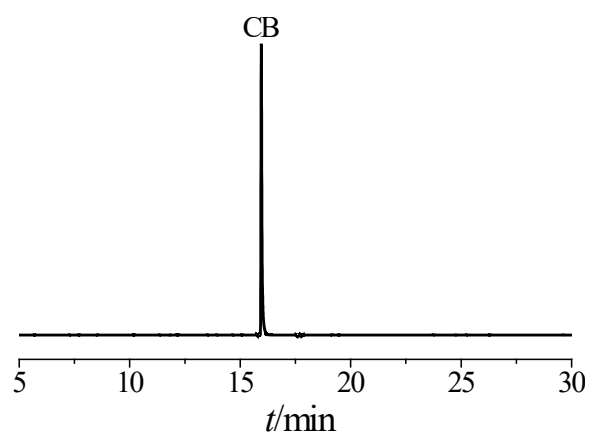

**Fig. S8** Analysis of chlorinated by-product by GC-MS during CB oxidation over HSiW/CeO<sub>2</sub> at 400 °C.
